# Supplementary material for: Rapid syndromic PCR testing in patients with respiratory tract infections reduces time to results and improves microbial yield
Source: PubMed Central journal article supplement (PMC8748978; doi:10.1038/s41598-021-03741-7), 2022-01-10
Supplement: 41598_2021_3741_MOESM1_ESM.pdf [file 41598_2021_3741_MOESM1_ESM.pdf]

# Supplementary material

## Rapid syndromic PCR testing in patients with respiratory tract infections reduces time to results and improves microbial yield

S. Serigstad<sup>1,2,3</sup>, D. Markussen<sup>1#</sup>, H.M.S. Grewal\*<sup>3,4</sup>, M. Ebbesen<sup>4#</sup>, Ø. Kommedal<sup>3,4</sup>, L. Heggelund<sup>3,5</sup>, C.H. van Werkhoven<sup>6</sup>, D. Faurholt-Jepsen<sup>3,7</sup>, T.W. Clark<sup>8</sup>, C. Ritz<sup>3,9</sup>, E. Ulvestad<sup>3,4</sup>, R. Bjørneklett<sup>1,2</sup>, S.T. Knoop<sup>1,4</sup> and the CAPNOR study group<sup>§</sup>

### Authors affiliations:

<sup>1</sup> Emergency Care Clinic, Haukeland University Hospital, Bergen, Norway

<sup>2</sup> Department of Clinical Medicine, University of Bergen, Bergen, Norway

<sup>3</sup> Department of Clinical Science, Bergen Integrated Diagnostic Stewardship cluster, University of Bergen, Bergen, Norway

<sup>4</sup> Department of Microbiology, Haukeland University Hospital, Bergen, Norway

<sup>5</sup> Department of Internal Medicine, Vestre Viken Hospital Trust, Drammen, Norway.

<sup>6</sup> Julius Center for Health Sciences and Primary Care, University Medical Center Utrecht, Utrecht, The Netherlands.

<sup>7</sup> Department of Infectious Diseases, Rigshospitalet, Denmark.

<sup>8</sup> School of Clinical and Experimental Sciences, Faculty of Medicine, University of Southampton, Southampton, UK

<sup>9</sup> National Institute of Public Health, University of Southern Denmark, Copenhagen, Denmark

# Equal contribution

§ A complete list of the CAPNOR study group is listed under Consortium.

### \*Corresponding author:

Harleen M.S. Grewal MD, PhD, Professor

Department of Clinical Science, Bergen Integrated Diagnostic Stewardship cluster, University of Bergen, Bergen, Norway

Department of Microbiology, Haukeland University Hospital, Bergen, Norway

Email address: harleen.grewal@uib.no

Phone number: +47 99450554

### Postal address:

University of Bergen

Department of Clinical Science,

Faculty of Medicine and Dentistry

The New Lab. Building

5021 Bergen, Norway

## Table of contents (page number)

|                                                                                                                                        |    |
|----------------------------------------------------------------------------------------------------------------------------------------|----|
| <b>S1:</b> BioFire® FilmArray® Pneumonia panel <i>plus</i> (FAP <i>plus</i> ) targets.....                                             | 3  |
| <b>S2:</b> Inclusion-/exclusion criteria, and definitions and diagnostic clinical criteria for community acquired pneumonia (CAP)..... | 4  |
| <b>S3:</b> Procedures for sputum induction and endotracheal aspiration.....                                                            | 5  |
| <b>S4:</b> Determining the clinical relevance of microbiological detections.....                                                       | 8  |
| References.....                                                                                                                        | 10 |

## Supplementary material section one (S1)

| <b>Supplementary table 1. BioFire® FilmArray® Pneumonia panel <i>plus</i> (FAP <i>plus</i>) targets</b> |                                               |
|---------------------------------------------------------------------------------------------------------|-----------------------------------------------|
| <b><u>Bacteria (semi-quantitative)</u></b>                                                              | <b><u>Atypical bacteria (qualitative)</u></b> |
| <i>Acinetobacter calcoaceticus-baumannii</i> complex                                                    | <i>Legionella pneumophila</i>                 |
| <i>Enterobacter cloacae</i>                                                                             | <i>Mycoplasma pneumoniae</i>                  |
| <i>Escherichia coli</i>                                                                                 | <i>Chlamydia pneumoniae</i>                   |
| <i>Haemophilus influenzae</i>                                                                           |                                               |
| <i>Klebsiella aerogenes</i>                                                                             | <b><u>Viruses (qualitative)</u></b>           |
| <i>Klebsiella oxytoca</i>                                                                               | Influenza A virus                             |
| <i>Klebsiella pneumoniae</i> group                                                                      | Influenza B virus                             |
| <i>Moraxella catarrhalis</i>                                                                            | Adenovirus                                    |
| <i>Proteus spp.</i>                                                                                     | Coronavirus                                   |
| <i>Pseudomonas aeruginosa</i>                                                                           | Parainfluenza virus 1-4                       |
| <i>Serratia marcescens</i>                                                                              | Respiratory syncytial virus                   |
| <i>Staphylococcus aureus</i>                                                                            | Human rhinovirus/enterovirus                  |
| <i>Streptococcus agalactiae</i>                                                                         | Human metapneumovirus                         |
| <i>Streptococcus pneumoniae</i>                                                                         | Middle East respiratory syndrome coronavirus  |
| <i>Streptococcus pyogenes</i>                                                                           |                                               |
| <b><u>Antibiotic resistance genes</u></b>                                                               |                                               |
| <b>ESBL:</b>                                                                                            |                                               |
| - CTX-M                                                                                                 |                                               |
| <b>Carbapenemases:</b>                                                                                  |                                               |
| - KPC                                                                                                   |                                               |
| - NDM                                                                                                   |                                               |
| - OXA-48-like                                                                                           |                                               |
| - VIM                                                                                                   |                                               |
| - IMP                                                                                                   |                                               |
| <b>Methicilin Resistance:</b>                                                                           |                                               |
| - mecA/mecC and MREJ                                                                                    |                                               |

## Supplementary material section two (S2)

### Inclusion- and exclusion criteria

#### Inclusion criteria:

- Adult aged  $\geq 18$  years
- Admitted to the emergency department (ED) with suspicion of community acquired pneumonia (CAP)
- Fulfilling at least two of the following criteria: new or worsening cough; new or worsening expectoration of sputum; new or worsening dyspnea; hemoptysis; pleuritic chest pain; radiological evidence of CAP; abnormalities on chest auscultation and/or percussion; fever ( $\geq 38.0$  °C).

#### Exclusion criteria:

- Hospitalization (>48 hours) within the last 14 days prior to admission
- Cystic fibrosis
- Severe bronchiectasis
- A palliative approach (defined as life expectancy below two weeks)
- Patient not willing or able to provide a lower respiratory tract sample

### Definitions and diagnostic clinical criteria for CAP. Adapted from Postma D.F. et al. <sup>1</sup>

#### Clinical CAP:

- Patients with the presence of at least two diagnostic criteria\* and in-hospital treatment and/or diagnosis of clinically suspected CAP documented by the treating physician and in agreement with the assessment by a study investigator. In case of disagreement, an additional study investigator will arbitrate.
- Patients with two or more diagnostic criteria and an obvious non-respiratory source of infection are not considered to have a clinical diagnosis of CAP.

#### Radiologically confirmed CAP:

- Clinical CAP
- The presence of a new or increased infiltrate on chest radiography or computer tomography (CT).

#### \* Diagnostic criteria:

- Cough: recent or worsening
- Production of purulent sputum or a change in the character of sputum
- Temperature  $>38.0$ °C or  $<36.1$ °C
- Auscultatory findings consistent with pneumonia, including rales, evidence of pulmonary consolidation (dullness on percussion, bronchial breath sounds, or egophony), or both
- Leukocytosis ( $>11.0 \times 10^9$  white cells per liter or  $> 8.2 \times 10^9$  neutrophils)
- C-reactive protein (CRP) level  $> 50$  mg/L
- Dyspnea, tachypnea, or hypoxemia: recent or worsening

## Supplementary material section three (S3) <sup>2-5</sup>

### Sputum induction by isotonic and/or hypertonic saline

#### Contraindications

Known airway obstruction due to high humidity or previous serious side effects due to inhalation with saline

#### Isotonic NaCl (0.9%)

- Patients with spontaneous production and expectoration of sputum
- Always the primary choice in patients with asthma, severe chronic obstructive pulmonary disease (COPD), obstructive airways (prolonged expirium, wheezing sounds), hypoxemia (SpO<sub>2</sub> < 92 %) or other known condition with hyper reactive airways
- Contact a physician for evaluation if:
  - Severe COPD (GOLD 3-4) with history of CO<sub>2</sub>-retention
  - If salbutamol (Ventoline)/ipratropiumbromid (Atrovent) is considered, a physician should be contacted if the patient is:
    - Pregnant
    - Has tachycardia/atrial fibrillation (persistent pulse > 120)

#### Hypertonic NaCl (1mmol/ml - 5.8 %)

- Patients with little sputum production and little cough
- Contact a physician for evaluation if:
  - Pregnant (**shall not be given to pregnant women**)
  - Obstructive airways (prolonged expirium, wheezing sounds)
  - Known asthma, severe COPD (GOLD 3-4) or other known condition with hyper reactive airways
  - SpO<sub>2</sub> < 92 %
  - Tachycardia/atrial fibrillation (persistent pulse > 120)

#### Implementation

Use hand disinfection and gloves when handling medications and equipment

- Use droplet precautions
- Only use sterile saline in the nebulizer and check the expiration date
- 5 ml NaCl (either isotonic or hypertonic) is put in the nebulization chamber

- If known asthma, severe COPD (GOLD 3-4), obstructive airways (prolonged expiration, wheezing sounds) or other known condition with hyper reactive airways:  
Use 2.5 ml NaCl and 2.5 ml salbutamol (Ventoline) (2 mg/ml)
- Mouthpiece is the first choice, but masks can also be used. Use nose clip if mouthpiece is used
- Adjust the airflow to 8 liters/minute. Check that the nebulizer is working and producing fine mist
- Observe the patients with regard to worsened respiratory symptoms. If this happens, abort the procedure, contact a physician and start salbutamol (5 mg) and ipratropiumbromid (0.5 mg) in the nebulizer
- If the patients do not provide sputum after the first round of nebulizing, and no side effects are reported, the preceding steps can be repeated by using hypertonic NaCl 1 mmol/ml (5.8%). If hypertonic NaCl was given without any bronchodilator in the first round, please add salbutamol (Ventoline) in the second round
- Avoid spills or soiling the outside of the container
- Inspect the volume, color and consistence of the material to decide if the test is of good quality
- Clean/disinfect contact points after the procedure

## Procedure diagnostic endotracheal aspiration

### Equipment

- Face mask with visor/glasses
- Clean gloves
- Wall mounted suction with hose
- Suction catheter with bent tip 14 Ch (green)
- Tracheal mucus extractor
- Lidocain gel
- Sterile container
- 10 mL sterile isotonic saline

### Procedure

- The patient should be positioned upright with the head slightly tilted backwards and the chin forwards
- Test the suction
- Connect the tracheal mucus extractor
- Use lidocaine gel at the tip of the catheter and in the patient's nose
- Do not touch the distal 15 cm of the catheter
- The catheter is inserted through the nose and down to the hypopharynx without suction, until respiratory sounds are audible through the catheter end
- The patient is then instructed to cough or take a deep breath, while the catheter is lead 3-5 cm further down into the trachea
- The catheter is then connected to the tracheal mucus extractor
- Start suction, but no more than 15 seconds at a time and without moving the catheter
- The catheter is retracted slowly with a rotating movement, without suction
- After the procedure, if necessary, the catheter can be flushed with 1-2 mL sterile isotonic saline to collect any remaining respiratory specimens into the sample container

## Supplementary material section four (S4)

### Determining the clinical relevance of microbiological detections<sup>6-23</sup>

#### 1. Clinically relevant

##### A. Proven etiology

###### Diagnosis of CAP AND

- i. Detection of the same bacteria in the respiratory tract specimen and blood culture
- ii. *Streptococcus pneumoniae* detected in respiratory tract specimen and positive pneumococcal urine antigen test
- iii. Detection of *C. pneumoniae*, *B. pertussis*, *L. pneumophila* or *M. pneumoniae* in respiratory tract specimen
- iv. Positive urine antigen test for *L. pneumophila*
- v. Growth of category B- or C-bacteria (Supplementary table 2) in blood culture and no other detectable focus of infection

##### B. Probable etiology

###### Diagnosis of CAP AND

- i. Detection of category B-bacteria in a respiratory tract specimen
- ii. Detection of category C-bacteria in respiratory tract specimens in a patient with chronic underlying disease<sup>a</sup> and/or patients with a recent history of antibiotic use<sup>b</sup>
- iii. Detection of a single species of category D-bacteria in a respiratory tract specimen in immunocompromised patients<sup>c</sup> and/or patients with a recent history of antibiotic use or other known risk of infections due to certain bacteria<sup>d</sup>
- iv. Detection of category D-bacteria in blood culture and no other detectable focus of infection
- v. Positive pneumococcal urine antigen test

#### 2. Uncertain relevance

- i. All detections not defined by the above criteria.

---

<sup>a</sup> Such as chronic lung disease, diabetes mellitus, chronic kidney disease, immunosuppression

<sup>b</sup> Two courses of antibiotics in the last 6 months

<sup>c</sup> Chronic lung disease, except for asthma, acquired or congenital immunodeficiency, including HIV-infection, chronic use of corticosteroids > 7,5 mg prednisolone or equipotent dosage, use of immunosuppressants (ATC L04), ongoing treatment with cytostatic (ATC L01).

<sup>d</sup> >Prior infection with resistant microbes (e.g., extended spectrum beta-lactamase (ESBL), Methicillin-resistant *Staphylococcus aureus* (MRSA)).



| <b>Supplementary table 2.</b> Respiratory tract microbes divided in different categories according to their potential clinical relevance                                                                                                                      |                                                                                                                                                                                                                                                                                                                                                                                                                                                                                                                     |
|---------------------------------------------------------------------------------------------------------------------------------------------------------------------------------------------------------------------------------------------------------------|---------------------------------------------------------------------------------------------------------------------------------------------------------------------------------------------------------------------------------------------------------------------------------------------------------------------------------------------------------------------------------------------------------------------------------------------------------------------------------------------------------------------|
| <b>Category</b>                                                                                                                                                                                                                                               | <b>Microbe</b>                                                                                                                                                                                                                                                                                                                                                                                                                                                                                                      |
| <p><b>A: Always pathogens</b><br/>Always considered relevant in a patient with respiratory tract infection</p>                                                                                                                                                | <p>Adenovirus<sup>9,11,15,17</sup><br/>Coronavirus<sup>11,15,17</sup><br/>Human metapneumovirus<sup>9,15,17</sup><br/>Influenza virus<sup>9,11,15,17</sup><br/>MERS<sup>12</sup><br/>Parainfluenza virus<sup>11,15,17</sup><br/>Rhinovirus<sup>9,15,17</sup><br/>RS-virus<sup>9,11,15,17</sup></p> <p><i>Bordetella pertussis</i><sup>9</sup><br/><i>Chlamydia pneumoniae</i><sup>6,9,11,15,17</sup><br/><i>Legionella pneumophila</i><sup>6,9,17</sup><br/><i>Mycoplasma pneumoniae</i><sup>6,9,11,15,17</sup></p> |
| <p><b>B: Usually pathogens</b><br/>Can be colonizers, but are usually considered relevant in a patient with pneumonia</p>                                                                                                                                     | <p><i>Haemophilus influenzae</i><sup>6,9,11,15,17</sup><br/><i>Streptococcus pneumoniae</i><sup>6,9,11,15,17,23</sup><br/><i>Streptococcus pyogenes</i><sup>14,21,23</sup></p>                                                                                                                                                                                                                                                                                                                                      |
| <p><b>C: Usually not pathogens</b><br/>Usually colonizers, but can cause pneumonia, especially in patient with chronic diseases</p>                                                                                                                           | <p><i>Klebsiella pneumoniae</i><sup>10,17,23</sup><br/><i>Moraxella catarrhalis</i><sup>6,8,15,17</sup><br/><i>Staphylococcus aureus</i><sup>6,15,17,18,23</sup></p>                                                                                                                                                                                                                                                                                                                                                |
| <p><b>D: Usually not pathogens</b><br/>A seldom cause of pneumonia in otherwise healthy patients. May be considered relevant if detected as the only bacterial species in a patient with immunosuppression and/or several previous courses of antibiotics</p> | <p><i>Acinetobacter calcoaceticus-baumannii-complex</i><sup>7,15,23</sup><br/><i>Enterobacter cloacae</i><sup>9,15,22</sup><br/><i>Escherichia coli</i><sup>9,15,17,22,23</sup><br/><i>Klebsiella aerogenes</i><sup>9,15</sup><br/><i>Klebsiella oxytoca</i><sup>9,15</sup><br/><i>Proteus species</i><sup>9,15,22</sup><br/><i>Pseudomonas aeruginosa</i><sup>15-17,22,23</sup><br/><i>Serratia marcescens</i><sup>9,15,22</sup><br/><i>Streptococcus agalactiae</i><sup>19</sup></p>                              |

## References

- 1 Postma, D. F. *et al.* Antibiotic treatment strategies for community-acquired pneumonia in adults. *N Engl J Med* **372**, 1312-1323, doi:10.1056/NEJMoa1406330 (2015).
- 2 Paggiaro, P. L. *et al.* Sputum induction. *Eur Respir J Suppl* **37**, 3s-8s, doi:10.1183/09031936.02.00000302 (2002).
- 3 Cataldo, D. *et al.* Induced sputum: comparison between isotonic and hypertonic saline solution inhalation in patients with asthma. *Chest* **120**, 1815-1821, doi:10.1378/chest.120.6.1815 (2001).
- 4 *Tuberculosis guidelines from the Norwegian Institute of Public Health*, <<http://www.fhi.no/artikler/?id=83629>> (last accessed 21<sup>st</sup> October 2021)
- 5 *National evidence based guidelines database by the Norwegian Institute of Public Health*, <<https://www.helsebiblioteket.no/fagprosedyrer/ferdige/indusert-sputum>> (last accessed 21<sup>st</sup> October 2021)
- 6 Apisarnthanarak, A. & Mundy, L. M. Etiology of community-acquired pneumonia. *Clin Chest Med* **26**, 47-55, doi:10.1016/j.ccm.2004.10.016 (2005).
- 7 Asai, N. *et al.* Clinical manifestations and risk factors of community-onset Acinetobacter species pneumonia in Japan; case control study in a single institute in Japan. *J Infect Chemother* **25**, 639-642, doi:10.1016/j.jiac.2019.03.016 (2019).
- 8 Hirai, J. *et al.* Clinical characteristics of community-acquired pneumonia due to Moraxella catarrhalis in adults: a retrospective single-centre study. *BMC Infect Dis* **20**, 821, doi:10.1186/s12879-020-05564-9 (2020).
- 9 Holter, J. C. *et al.* Etiology of community-acquired pneumonia and diagnostic yields of microbiological methods: a 3-year prospective study in Norway. *BMC Infect Dis* **15**, 64, doi:10.1186/s12879-015-0803-5 (2015).
- 10 Lin, Y. T., Jeng, Y. Y., Chen, T. L. & Fung, C. P. Bacteremic community-acquired pneumonia due to Klebsiella pneumoniae: clinical and microbiological characteristics in Taiwan, 2001-2008. *BMC Infect Dis* **10**, 307, doi:10.1186/1471-2334-10-307 (2010).
- 11 Mandell, L. A. Community-acquired pneumonia: An overview. *Postgrad Med* **127**, 607-615, doi:10.1080/00325481.2015.1074030 (2015).
- 12 Memish, Z. A., Perlman, S., Van Kerkhove, M. D. & Zumla, A. Middle East respiratory syndrome. *Lancet* **395**, 1063-1077, doi:10.1016/S0140-6736(19)33221-0 (2020).
- 13 Metlay, J. P. *et al.* Diagnosis and Treatment of Adults with Community-acquired Pneumonia. An Official Clinical Practice Guideline of the American Thoracic Society and Infectious Diseases Society of America. *American Journal of Respiratory and Critical Care Medicine* **200**, e45-e67, doi:10.1164/rccm.201908-1581ST (2019).
- 14 Muller, M. P. *et al.* Clinical and epidemiologic features of group a streptococcal pneumonia in Ontario, Canada. *Arch Intern Med* **163**, 467-472, doi:10.1001/archinte.163.4.467 (2003).
- 15 Musher, D. M. & Thorner, A. R. Community-Acquired Pneumonia. *New England Journal of Medicine* **371**, 1619-1628, doi:10.1056/NEJMra1312885 (2014).
- 16 Restrepo, M. I. *et al.* Burden and risk factors for Pseudomonas aeruginosa community-acquired pneumonia: a multinational point prevalence study of hospitalised patients. *Eur Respir J* **52**, doi:10.1183/13993003.01190-2017 (2018).
- 17 Rider, A. C. & Frazee, B. W. Community-Acquired Pneumonia. *Emerg Med Clin North Am* **36**, 665-683, doi:10.1016/j.emc.2018.07.001 (2018).
- 18 Self, W. H. *et al.* Staphylococcus aureus Community-acquired Pneumonia: Prevalence, Clinical Characteristics, and Outcomes. *Clin Infect Dis* **63**, 300-309, doi:10.1093/cid/ciw300 (2016).
- 19 Skolnik, K. *et al.* Group B streptococcus (GBS) is an important pathogen in human disease- but what about in cystic fibrosis? *BMC Infect Dis* **17**, 660, doi:10.1186/s12879-017-2729-6 (2017).

- 20 Stralin, K., Olcen, P., Tornqvist, E. & Holmberg, H. Definite, probable, and possible bacterial aetiologies of community-acquired pneumonia at different CRB-65 scores. *Scand J Infect Dis* **42**, 426-434, doi:10.3109/00365540903552353 (2010).
- 21 Tamayo, E., Montes, M., Vicente, D. & Pérez-Trallero, E. Streptococcus pyogenes Pneumonia in Adults: Clinical Presentation and Molecular Characterization of Isolates 2006-2015. *PLoS One* **11**, e0152640, doi:10.1371/journal.pone.0152640 (2016).
- 22 von Baum, H., Welte, T., Marre, R., Suttorp, N. & Ewig, S. Community-acquired pneumonia through Enterobacteriaceae and Pseudomonas aeruginosa: Diagnosis, incidence and predictors. *Eur Respir J* **35**, 598-605, doi:10.1183/09031936.00091809 (2010).
- 23 Wongsurakiat, P. & Chitwarakorn, N. Severe community-acquired pneumonia in general medical wards: outcomes and impact of initial antibiotic selection. *BMC Pulm Med* **19**, 179, doi:10.1186/s12890-019-0944-1 (2019).
